# Supplementary material for: Single Ventricle Reconstruction III: Brain Connectome and Neurodevelopmental Outcomes: Design, Recruitment, and Technical Challenges of a Multicenter, Observational Neuroimaging Study
Source: MDPI journal article supplement (doi:10.3390/diagnostics13091604), 2023-04-30
Supplement: s1 [file s1]

**Supplemental Table S1: SVRIII Brain Connectome Protocol: Harmonized Parameters for Siemens and Phillips 3T MRI**

|                             |         |         | Matrix    | slices | FOV       | % FOV phase | Resolution (mm) | TR (ms)   | TE (ms) | TI (ms) | Flip Angle (deg) | Parallel Imaging | Multi-band Acceleration | Phase partial Fourier | Diffusions Directions | b-values   | Acquisition Time   |
|-----------------------------|---------|---------|-----------|--------|-----------|-------------|-----------------|-----------|---------|---------|------------------|------------------|-------------------------|-----------------------|-----------------------|------------|--------------------|
| Diffusion Imaging           | Siemens | DTI     | 128 x 128 | 60     | 256 x 256 | 87.50%      | 2.0 x 2.0 x 2.0 | 8600      | 79      | N/A     | 90               | 2x               | Off                     | 6/8                   | 42                    | 1000       | 7:27               |
|                             |         | HARDI   | 100 x 100 | 60     | 240 x 240 | 100%        | 2.4 x 2.4 x 2.4 | 3300/3600 | 110/131 | N/A     | 90               | Off              | 3                       | 6/8                   | 64 x 4                | 3000, 5000 | 3:54 x 2, 4:16 x 2 |
|                             | Philips | DTI     | 128 x 128 | 60     | 256 x 256 | 87.50%      | 2.0 x 2.0 x 2.0 | 6640      | 75      | N/A     | 90               | 2x               | Off                     | 6/8                   | 42                    | 1000       | 7:31               |
|                             |         | HARDI   | 100 x 100 | 60     | 240 x 240 | 100%        | 2.4 x 2.4 x 2.4 | 3033/3266 | 105/116 | N/A     | 90               | Off              | 3                       | 6/8                   | 64 x 4                | 2500, 4000 | 4:14 x 2, 4:46 x 2 |
| Resting BOLD functional MRI | Siemens | rs-fMRI | 64 x 64   | 36     | 256       | 100%        | 4.0 x 4.0 x 4.0 | 650       | 32      | N/A     | 50               | Off              | 4                       | 6/8                   | N/A                   | N/A        | 5:09 x 2           |
|                             | Philips | rs-fMRI | 64 x 64   | 36     | 256       | 100%        | 4.0 x 4.0 x 4.0 | 800       | 32      | N/A     | 90               | Off              | 4                       | 6/8                   | N/A                   | N/A        | 5:07 x 2           |
| 3D T1&T2                    | Siemens | T1      | 256 x 256 | 160    | 256 x 256 | 87.50%      | 1.0 x 1.0 x 1.0 | 2400      | 3.16    | 1200    | 8                | 2x               | Off                     | Off                   | N/A                   | N/A        | 6:18               |
|                             |         | T2      | 256 x 256 | 160    | 256 x 256 | 100%        | 1.0 x 1.0 x 1.0 | 3200      | 411     | N/A     | Variable         | 2x               | Off                     | Off                   | N/A                   | N/A        | 3:30               |
|                             | Philips | T1      | 256 x 256 | 160    | 256 x 256 | 87.50%      | 1.0 x 1.0 x 1.0 | 1870      | 3.3     | 900     | 8                | 2x               | Off                     | Off                   | N/A                   | N/A        | 4:02               |
|                             |         | T2      | 256 x 256 | 160    | 256 x 256 | 100%        | 1.0 x 1.0 x 1.0 | 2500      | 253     | N/A     | Variable         | 2x               | Off                     | Off                   | N/A                   | N/A        | 4:28               |
